RESEARCH ARTICLE

# Effect of continuous positive airway pressure on carotid intima-media thickness in patients with obstructive sleep apnea: A meta-analysis

Li-Da Chen<sup>1</sup>, Li Lin<sup>1</sup>, Xue-Jun Lin<sup>2</sup>, Yang-Wu Ou<sup>1</sup>, Zhi Wu<sup>1</sup>, Yu-Ming Ye<sup>1</sup>, Qiao-Zhen Xu<sup>1</sup>, Ya-Ping Huang<sup>1</sup>, Zhi-Ming Cai<sup>1\*</sup>

**1** From Department of Respiratory Medicine, Zhangzhou Affiliated Hospital of Fujian Medical University, Xiangcheng District, Zhangzhou, Fujian Province, People's Republic of China, **2** From Department of Laboratory Medicine, Zhangzhou Affiliated Hospital of Fujian Medical University, Xiangcheng District, Zhangzhou, Fujian Province, People's Republic of China

\* [zzsyycaizhiming@163.com](mailto:zzsyycaizhiming@163.com)

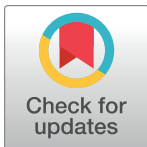

**OPEN ACCESS**

**Citation:** Chen L-D, Lin L, Lin X-J, Ou Y-W, Wu Z, Ye Y-M, et al. (2017) Effect of continuous positive airway pressure on carotid intima-media thickness in patients with obstructive sleep apnea: A meta-analysis. PLoS ONE 12(9): e0184293. <https://doi.org/10.1371/journal.pone.0184293>

**Editor:** Andrea Romigi, University of Rome Tor Vergata, ITALY

**Received:** May 3, 2017

**Accepted:** August 20, 2017

**Published:** September 1, 2017

**Copyright:** © 2017 Chen et al. This is an open access article distributed under the terms of the [Creative Commons Attribution License](https://creativecommons.org/licenses/by/4.0/), which permits unrestricted use, distribution, and reproduction in any medium, provided the original author and source are credited.

**Data Availability Statement:** All relevant data are within the paper and its Supporting Information files.

**Funding:** The Fujian Provincial Health Bureau provided financial support in the form of Youth Research Fund (grant 2015–1–98). The funders had no role in study design, data collection and analysis, decision to publish, or preparation of the manuscript.

**Competing interests:** The authors have declared that no competing interests exist.

## Abstract

### Objective

Obstructive sleep apnea (OSA) is associated with increased carotid intima-media thickness (IMT), an early marker of atherosclerosis. Continuous positive airway pressure (CPAP) is the first-line treatment for OSA. A meta-analysis was performed to determine whether CPAP therapy could decrease carotid IMT.

### Methods

The PubMed, Embase, Web of Science, and Cochrane library were searched before March, 2017. Weighted mean difference (WMD) was calculated to estimate the treatment effects of pre and post-CPAP therapy. Seven studies were examined and the meta-analysis was performed using STATA 12.0.

### Results

There was no change of carotid IMT before and after CPAP treatment in OSA patients (WMD = 0.052, 95% confidence interval (CI) = -0.002 to 0.105,  $z = 1.90$ ,  $p = 0.057$ ). Meanwhile, meta-analysis of the two RCTs showed that carotid IMT was not changed in CPAP group when compared with control group (WMD = 0.002, 95% CI = -0.125 to 0.129,  $z = 0.03$ ,  $p = 0.976$ ). Subgroup analyses indicated that carotid IMT was significantly decreased after CPAP use in more severe OSA patients ( $AHI \geq 50$ ) (WMD = 0.073, 95% CI = 0.022 to 0.124,  $z = 2.80$ ,  $p = 0.005$ ) and patients with therapeutic duration  $\geq 6$  months (WMD = 0.121, 95% CI = 0.019 to 0.223,  $z = 2.32$ ,  $p = 0.021$ ).

### Conclusions

CPAP had no impact on carotid IMT in OSA patients. However, carotid IMT was significantly decreased after CPAP treatment in more severe OSA patients and patients with longer CPAP usage.

## Introduction

Obstructive sleep apnea (OSA) is the most common type of sleep disorder characterized by repetitive episodes of partial or complete upper airway obstruction during sleep [1]. It affects 4% of adult men and 2% of adult women [2]. OSA has been shown to be an important independent risk factor for cardiovascular diseases and cognitive impairment [3, 4]. Various different mechanisms are involved in the pathogenesis of cardiovascular disorders and cognitive impairment in OSA patients.

Carotid intima-media thickness (IMT) is defined as the distance between the lumen-intima interface and the media-adventitia interface of the artery wall. Carotid IMT is an early marker of atherosclerosis and predicts future cardiovascular events [5, 6]. Meanwhile, some investigations have suggested that the presence of a severe carotid stenosis or occlusion negatively influences cognitive performances [7, 8]. Many studies have investigated the correlation between OSA and carotid IMT measurements and have demonstrated that severity of OSA is independently related to the carotid IMT [9–11].

Continuous positive airway pressure (CPAP) is currently recognized as the first line therapy of OSA. Previous studies have shown conflicting results on the effect of CPAP on carotid IMT in patients with OSA [12–15]. Some studies demonstrated the favorable effect of CPAP on carotid IMT [12, 13], while others did not [14, 15]. Meta-analysis is a reliable way to address discrepancies between studies; therefore, we conducted a meta-analysis to evaluate the efficacy of CPAP on carotid IMT among patients with OSA.

## Materials and methods

### Search strategy

The Embase, PubMed, Cochrane Library and Web of Science were searched from inception to March 29th, 2017 for related literature. Searches combined free-text and MeSH terms, and the following search terms were used: “sleep apnea or sleep disordered breathing” and “continuous positive airway pressure or CPAP” and “carotid intima-media thickness”. The reference lists of the retrieved articles were checked to identify additional papers. Two researchers independently identified the eligible studies.

### Inclusion/Exclusion criteria of literature

We selected studies that met the following inclusion criteria: 1. The published article had to be in English; 2. All subjects were adults (>18 y) with newly diagnosed OSA; 3. CPAP was applied; 4. Measuring the carotid IMT by ultrasound; 5. Mean and SD (or SE) of common carotid IMT must be reported before and after CPAP therapy. All case reports, case series, abstracts, editorials, conference articles, letters, animal studies and review articles were excluded. If any of the required data could not be found in the published report, the corresponding author was contacted to provide the missing data of interest. Any disagreement between the two reviewers was resolved after additional discussion.

### Data extraction

The following information was abstracted and evaluated independently by two investigators, including the first author, publication year, country of the study, the number of patients, gender distribution, patient inclusion criteria, study design, mean daily CPAP usage time, duration of CPAP therapy, carotid IMT measurement, participant characteristics, common carotid IMT before and after CPAP treatment.

## Statistical analysis

The meta-analysis was conducted using Stata Version 12.0 for Windows (Stata Corporation, College Station, Texas, USA). Weighted mean difference (WMD) was used for analyzing the summary estimates, as the outcome measure was the same for each analysis. The statistical heterogeneity was assessed using the Q and  $I^2$  statistics (significance was set at  $p < 0.10$  or  $I^2 > 50\%$ ). A random-effects model was used when significant heterogeneity was observed; otherwise, a fixed effects model was utilized. Furthermore, to explore the possible sources of heterogeneity in CPAP treatment effects, sensitive analysis and subgroup analysis were conducted. Publication bias was visually evaluated using funnel plots and statistically assessed using Egger's and Begg's tests and the 'trim and fill' method. A p value  $< 0.05$  was adopted as statistically significant.

## Results

### Searching results

After excluding duplicates, our search identified 146 references. Of these, 10 studies were considered to be potentially relevant after a review of the titles and abstracts. Among the 10 studies, 3 studies were excluded from the sample for the following reasons: 2 were non-English studies [16, 17], 1 was retracted article [18]. Finally, 7 studies were included in the meta-analysis. The detailed steps of the literature search were presented in Fig 1.

### Characteristics of the studies

A total of 167 cases from the 7 identified studies were included in this meta-analysis. Two studies were randomized clinical trials (RCTs) [15, 19]; the remaining studies were observational [12, 14, 20–22]. One study [12] reported results separately for the 6 month group and the 12 month group, and only the data of the 12-month group was extracted. The characteristics of the 7 included studies and the patients' characteristics were summarized in Tables 1 and 2, respectively. Two RCTs are summarized in Table 3.

### Pool analysis

Significant heterogeneity was detected among the included studies (chi-squared = 13.69,  $p = 0.033$ ;  $I^2 = 56.2\%$ ). Therefore, a random-effect model was used for the pooled analysis. No significant difference in carotid IMT in OSA patients was observed before and after CPAP treatment after pooling the data with meta-analysis (WMD = 0.052, 95% confidence interval (CI) = -0.002 to 0.105,  $z = 1.90$ ,  $p = 0.057$ ) (Fig 2). Meta-analysis of the two RCTs showed that carotid IMT was no changed in CPAP group when compared with control group. (WMD = 0.002 95% CI = -0.125 to 0.129,  $z = 0.03$ ,  $p = 0.976$ , random effects model) (Fig 3).

### Sensitivity and subgroup analyses

Sensitivity analysis showed that removal of each single study did not alter the overall results of pooled analyses (Fig 4). Subgroup analysis revealed that carotid IMT was significantly decreased after CPAP use in more severe OSA patients ( $AHI \geq 50$ ) (WMD = 0.073, 95% CI = 0.022 to 0.124,  $z = 2.80$ ,  $p = 0.005$ ) and patients with therapeutic duration  $\geq 6$  months (WMD = 0.121, 95% CI = 0.019 to 0.223,  $z = 2.32$ ,  $p = 0.021$ ). While the differences in baseline BMI, age, and sample size did not affect CPAP efficacy. The detailed results of the subgroup analyses are presented in Table 4.

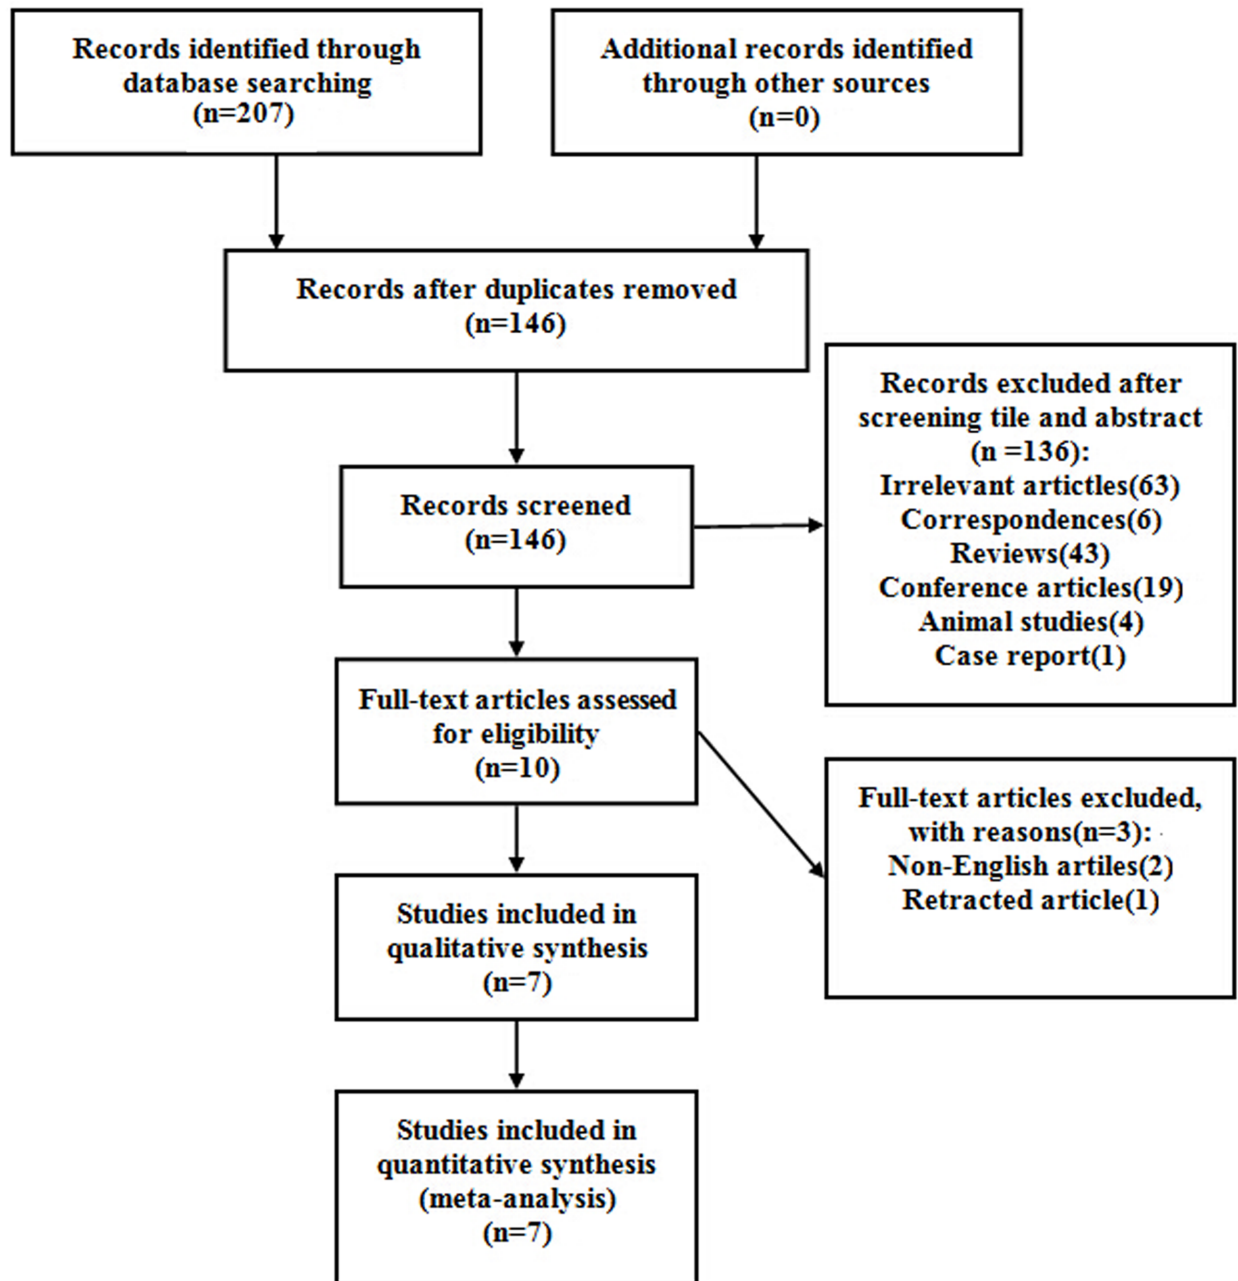

**Fig 1. Flow diagram of study selection.**

<https://doi.org/10.1371/journal.pone.0184293.g001>

### Publication bias

The publication bias was not considered significant (Begg’s test,  $p = 0.548$ ; Egger’s test,  $p = 0.245$ ) (Fig 5). In addition, the trim-and-fill method showed that no study needed to be statistically corrected for funnel plot asymmetry.

### Discussion

To our knowledge, this is the first meta-analysis to determine the impact of OSA treatment with CPAP on carotid IMT. The findings of the present meta-analysis comprising of 167

**Table 1. Characteristics of include studies.**

| Study       | Year | Nation    | Sample size/male | Inclusion criteria | Ventilation duration/night (h) | Therapy duration | Carotid IMT measurement                                                                                                                                                           | Study design        |
|-------------|------|-----------|------------------|--------------------|--------------------------------|------------------|-----------------------------------------------------------------------------------------------------------------------------------------------------------------------------------|---------------------|
| Drager      | 2007 | Brazil    | 12/12            | AHI>30             | 6±0.6                          | 4M               | Carotid IMT was measured at the thickest point, on the near and far walls with a specially designed computer program.                                                             | RCT                 |
| Li          | 2009 | China     | 20/20            | AHI≥15             | 6–8                            | 3M               | Carotid IMT was defined as the distance from the leading edge of the first echogenic line to the leading edge of the second echogenic line in the sonographic image.              | Observational study |
| Hui         | 2012 | Hong Kong | 28/25            | AHI≥5              | 4.7±2.1                        | 12M              | Carotid IMT was defined as the distance between the leading edge of the luminal echo to that of the media/adventitia echo and analyzed with a computerized edge-detection system. | Observational study |
| Agha        | 2014 | Egypt     | 17/NR            | AHI≥15             | NR                             | 6M               | Carotid IMT was defined as the distance between the leading edge of the luminal echo to that of the media/adventitia echo.                                                        | Observational study |
| Kostopoulos | 2016 | Greece    | 25/NR            | AHI≥15             | >4                             | 3M               | NR                                                                                                                                                                                | Observational study |
| Ng          | 2016 | Hong Kong | 45/32            | AHI≥5              | 4.2±2.1                        | 3M               | Carotid IMT measurements were obtained at the thickest point (plaque-free section) on the far wall of distal common carotid artery, within 1.5 cm proximal to the flow divider.   | RCT                 |
| Amin        | 2016 | Kuwait    | 20/15            | AHI≥5              | NR                             | 6M               | Carotid IMT was defined as the distance between the leading edge of the luminal echo to that of the media/adventitia echo.                                                        | Observational study |

Abbreviation: RCT = randomized controlled trial, AHI = apnea-hypopnea index, NR = not reported, h = hour, M = month, IMT = intima-media thickness.

<https://doi.org/10.1371/journal.pone.0184293.t001>

**Table 2. Patients' characteristics of the trials included in the meta-analysis.**

| Study       | Age               | AHI          | LowSO <sub>2</sub> | Pre-BMI            | Post-BMI | Pre-CPAP carotid IMT(mm) | Post-CPAP carotid IMT(mm) |
|-------------|-------------------|--------------|--------------------|--------------------|----------|--------------------------|---------------------------|
| Drager      | 44 ±7             | 56 ±22       | 74 ± 11            | 29.9 ± 3.0         | 29.8±3.0 | 0.707 ±0.105             | 0.645± 0.095              |
| Li          | NR                | 54.25±22.78  | 71.78±13.98        | NR                 | NR       | 0.90±0.19                | 0.88±0.16                 |
| Hui         | 48.8±9.5          | 39.0 ±19.0   | 74.7 ±11.1         | 28.2±3.7           | 28.3±4.2 | 0.758±0.159              | 0.705±0.106               |
| Agha        | NR                | NR           | NR                 | NR                 | NR       | 1.31±0.4                 | 0.99±0.21                 |
| Kostopoulos | 47.2±10.6(N = 28) | 43.2(N = 28) | 76.2(N = 28)       | 34.05 ±7.7(N = 28) | NR       | 0.696 ±0.168             | 0.7±0.163                 |
| Ng          | 50.3 ±10.1        | 30.6 ±21.4   | 79.6± 10.8         | 28.2± 3.9          | NR       | 0.74 ±0.21               | 0.77±0.19                 |
| Amin        | 51±11             | 51 ±17       | 72±13              | 33.7±5.4           | NR       | 0.702±0.134              | 0.587±0.134               |

Abbreviation: BMI = body mass Index, AHI = apnea-hypopnea index, LowSO<sub>2</sub> = lowest O<sub>2</sub> saturation, CPAP = continuous positive airway pressure, IMT = intima-media thickness, NR = not reported.

<https://doi.org/10.1371/journal.pone.0184293.t002>

patients suggested that CPAP had no impact on carotid IMT, an early marker of atherosclerosis, in OSA patients. The results were further confirmed by the pool analysis of two RCTs. However, subgroup analyses showed that CPAP was associated with a statistically significant decrease on carotid IMT in more severe OSA patients (AHI≥50) and patients with therapeutic duration ≥6 months.

**Table 3. Characteristics of two randomized controlled trials.**

| Author | Year | Study design | Treatment group |                                      | Control group |             |                                      | Jadad score |
|--------|------|--------------|-----------------|--------------------------------------|---------------|-------------|--------------------------------------|-------------|
|        |      |              | Sample size     | Change from baseline carotid IMT(mm) | type          | Sample size | Change from baseline carotid IMT(mm) |             |
| Drager | 2007 | Parallel     | 12              | -0.062±0.1                           | No treatment  | 12          | 0.008±0.157                          | 3           |
| Ng     | 2016 | Parallel     | 45              | 0.03±0.2                             | Sham CPAP     | 45          | -0.03±0.1                            | 5           |

Abbreviation: IMT = intima-media thickness, CPAP = continuous positive airway pressure.

<https://doi.org/10.1371/journal.pone.0184293.t003>

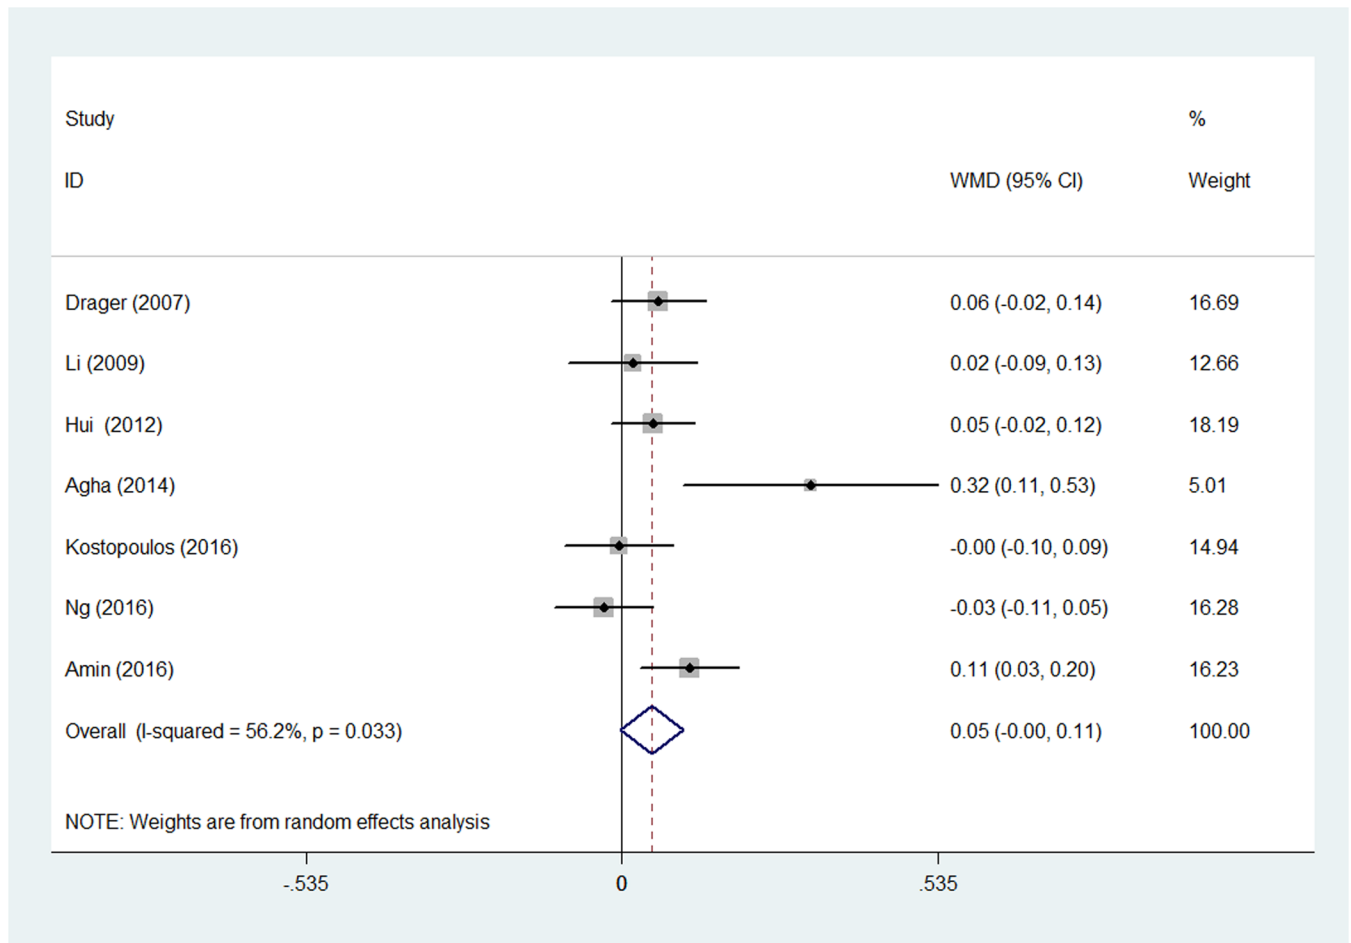

**Fig 2. Forest plot for the change in carotid IMT before and after CPAP treatment.** Abbreviation: CPAP = continuous positive airway pressure, IMT = intima-media thickness WMD = weighted mean difference.

<https://doi.org/10.1371/journal.pone.0184293.g002>

Carotid IMT as assessed with carotid ultrasonography is a sensitive and reproducible marker for early and subclinical atherosclerosis. Carotid IMT greater than 0.8 mm is a marker of increased cardiovascular risk according to some studies [23–25]. Polak et al [5] followed 2965 members of the Framingham Offspring Study cohort for an average of 7.2 years and found that the maximum internal and mean common carotid-artery IMT both predicted cardiovascular outcomes. A meta-analysis including 1196 patients from 15 articles showed that a 0.1 mm increase in carotid IMT was predictive for myocardial infarction (HR 1.15, 95% CI 1.12–1.18) and for stroke (HR 1.17, 95% CI 1.15–1.21) [26]. It is also suggested that carotid stenosis may contribute to the development of cognitive dysfunction [7, 8]. In a study including 127 bilateral asymptomatic carotid stenosis, 150 unilateral asymptomatic carotid stenosis and 56 no carotid stenosis subjects, Balucani [8] found that subjects with bilateral asymptomatic carotid stenosis and subjects with unilateral asymptomatic carotid stenosis are more likely to have cognitive dysfunction compared to subjects with no carotid stenosis.

The relationship between OSA and carotid IMT has been well established in the previous literature [9–11]. In a study enrolling mild to moderate OSA, severe OSA and control groups matched for age, sex, and BMI, Drager et al [9] demonstrated a higher carotid IMT in severe OSA patients compared to mild to moderate OSA patients and non-OSA controls. Further

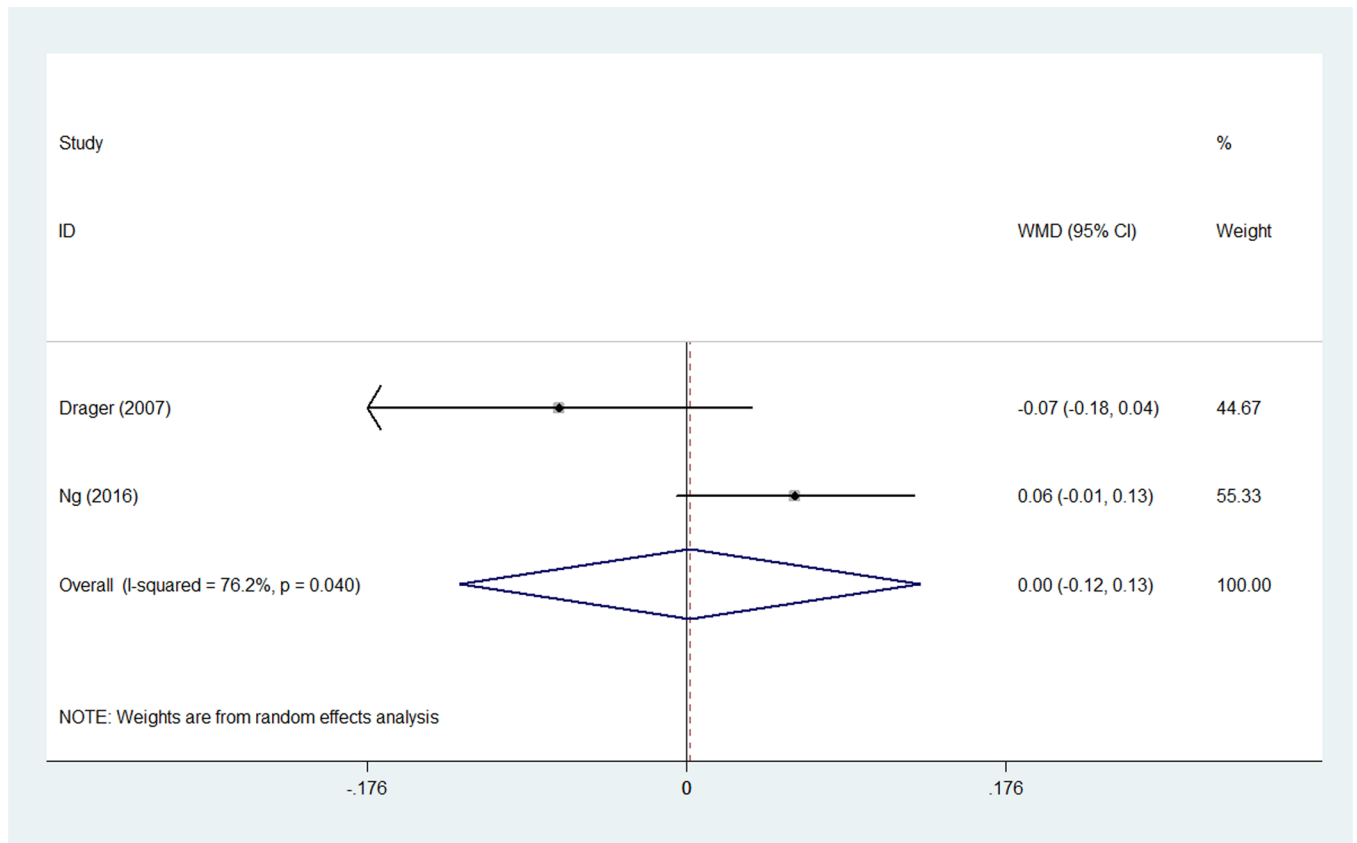

**Fig 3. Forest plot for the change in carotid IMT between CPAP treatment group and control group in two RCTs.** Abbreviation: CPAP = continuous positive airway pressure, IMT = intima-media thickness WMD = weighted mean difference.

<https://doi.org/10.1371/journal.pone.0184293.g003>

multivariate analyses showed that the AHI correlated independently with IMT variability. A cross-sectional analysis of 83 patients identified that the severity of oxygen desaturation was one of the best predictors for carotid IMT and plaque occurrence in OSA patients [10]. In a study investigating the relationship between OSA and impairment of functional (Breath-Holding Index) and anatomic (IMT) characteristics of cerebral vessels, Buratti et al [27] found that pathological values of IMT and Breath-Holding Index were significantly associated with the presence of OSA after multivariate analysis (IMT > 1.0 mm: OR 2.98, 95%CI: 1.37–6.46; BHI < 0.69: OR 5.25, 95%CI: 2.35–11.74). A recent meta-analysis including 18 studies comparing carotid IMT of patients with OSA versus non-OSA patients found that patients with OSA had a significantly higher carotid IMT than healthy controls. After adjustment for several major confounders, OSA was an independent risk factor for carotid IMT [28]. OSA may promote carotid atherosclerosis through several mechanisms: intermittent hypoxemia, sympathetic nervous system overactivity, oxidative stress, endothelial dysfunction, lipid peroxidation and abnormal production of inflammatory cytokines [3, 29, 30].

CPAP treatment can effectively relieve obstruction of the airway, reversing OSA-associated hypoxia, sympathetic activation, oxidative stress, inflammatory cytokine levels [31, 32]. All of these factors may contribute to carotid atherosclerosis observed in patient with OSA. Hence, it was speculated to be beneficial to decrease carotid IMT in OSA patients. However, the present meta-analysis suggested that CPAP had no impact on carotid IMT in OSA patients. This conclusion was further supported by the pool analysis of the two RCTs. The results of subgroup



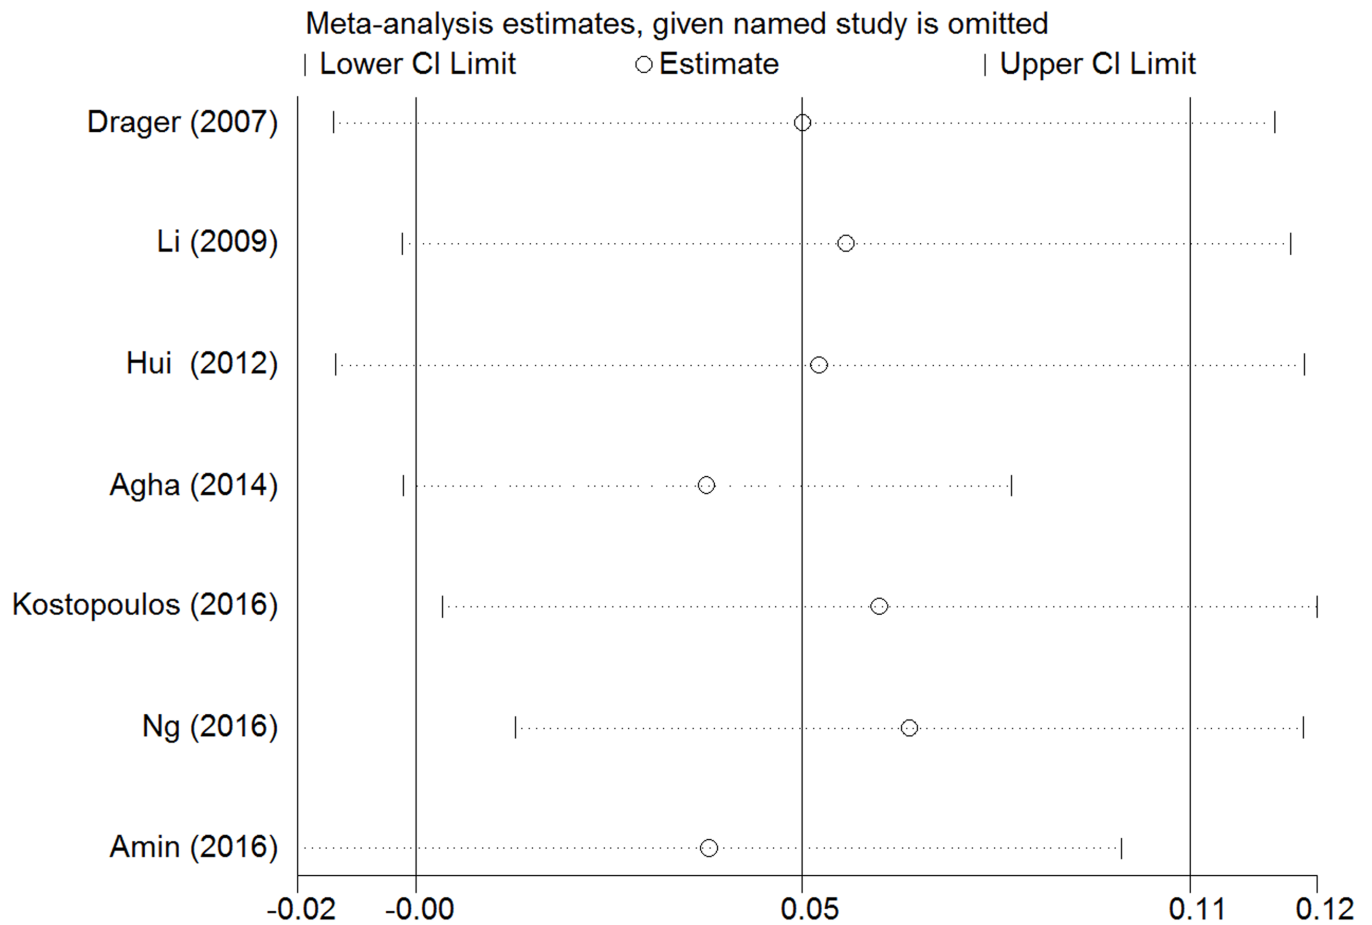

Fig 4. Sensitivity analysis of the included studies. Abbreviation: CI = confidence interval.

<https://doi.org/10.1371/journal.pone.0184293.g004>

Table 4. The results of subgroup analyses.

| Subgroup             | Number of studies/patients | Heterogeneity |       |           | WMD   |               |      |       |  |
|----------------------|----------------------------|---------------|-------|-----------|-------|---------------|------|-------|--|
|                      |                            | $\chi^2$      | P     | $I^2$ (%) | WMD   | 95%CI         | Z    | P     |  |
| Age                  |                            |               |       |           |       |               |      |       |  |
| <50                  | 3/65                       | 1.30          | 0.523 | 0.0       | 0.042 | -0.004to0.088 | 1.78 | 0.075 |  |
| ≥50                  | 2/65                       | 5.88          | 0.015 | 83.0      | 0.042 | -0.100to0.185 | 0.59 | 0.558 |  |
| BMI                  |                            |               |       |           |       |               |      |       |  |
| <30                  | 3/85                       | 3.03          | 0.219 | 34.1      | 0.030 | -0.025to0.086 | 1.08 | 0.279 |  |
| ≥30                  | 2/45                       | 3.55          | 0.059 | 71.8      | 0.057 | -0.059to0.174 | 0.96 | 0.336 |  |
| AHI                  |                            |               |       |           |       |               |      |       |  |
| <50                  | 3/98                       | 2.40          | 0.302 | 16.5      | 0.011 | -0.040to0.062 | 0.43 | 0.667 |  |
| ≥50                  | 3/52                       | 1.97          | 0.374 | 0.0       | 0.073 | 0.022to0.124  | 2.80 | 0.005 |  |
| Follow time (months) |                            |               |       |           |       |               |      |       |  |
| <6                   | 4/102                      | 2.62          | 0.454 | 0.0       | 0.013 | -0.032to0.057 | 0.57 | 0.571 |  |
| ≥6                   | 3/65                       | 5.79          | 0.055 | 65.4      | 0.121 | 0.019to0.223  | 2.32 | 0.021 |  |
| Sample size          |                            |               |       |           |       |               |      |       |  |
| <20                  | 2/29                       | 4.87          | 0.027 | 79.5      | 0.171 | -0.079to0.421 | 1.34 | 0.180 |  |
| ≥20                  | 5/138                      | 6.95          | 0.139 | 42.4      | 0.033 | -0.018to0.084 | 1.28 | 0.202 |  |

Abbreviation: WMD = weighted mean difference, BMI = body mass index, AHI = apnea-hypopnea index.

<https://doi.org/10.1371/journal.pone.0184293.t004>



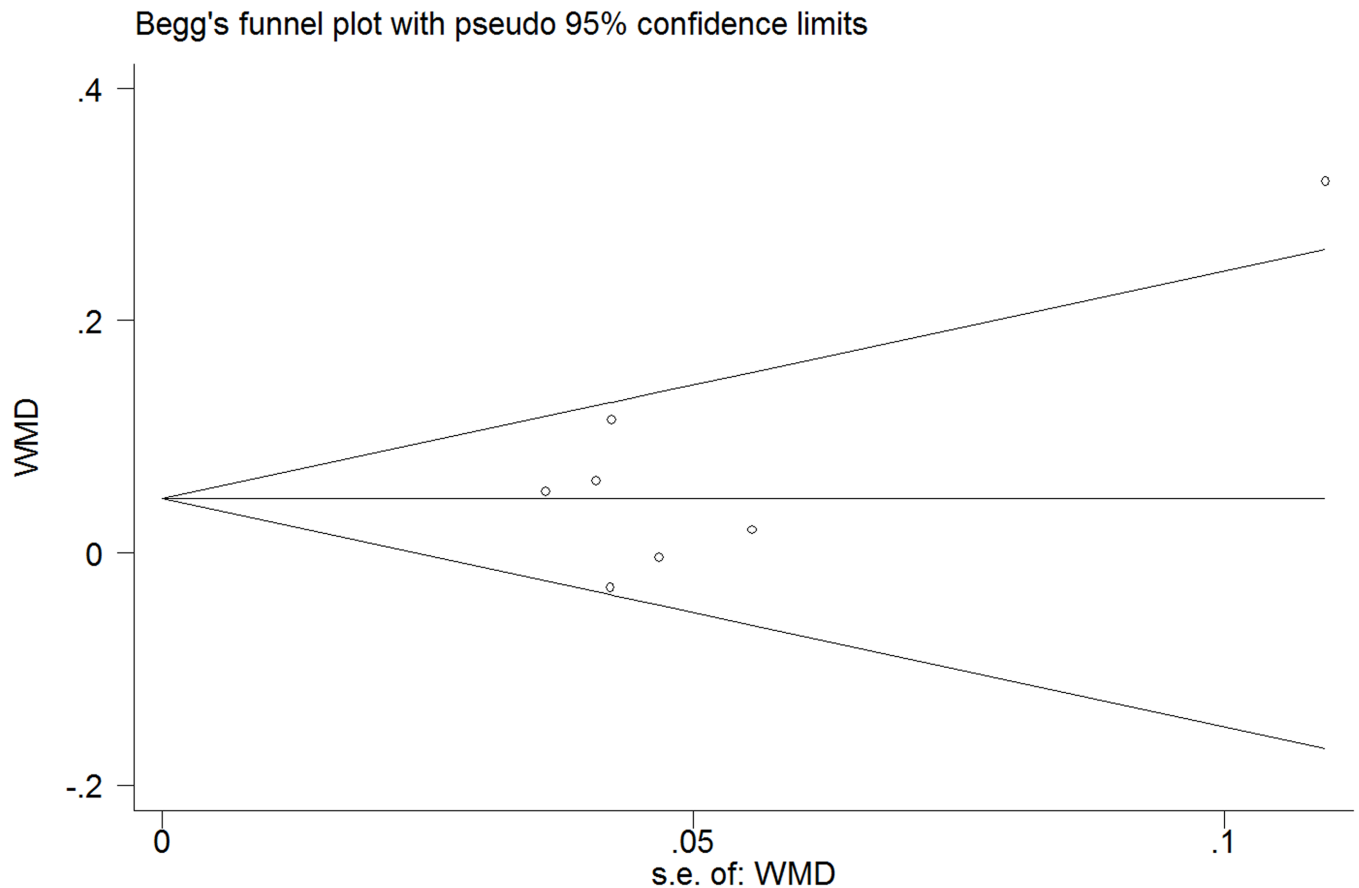

**Fig 5. Funnel plots for assessing publication bias of studies included.** SE = standard error, WMD = weighted mean difference.

<https://doi.org/10.1371/journal.pone.0184293.g005>

analyses showed that carotid IMT was significantly decreased in more severe OSA patients and patients with longer therapy duration. Based on above findings, we believed that the therapy duration and baseline severity of OSA was the important factors influencing the effectiveness of CPAP treatment. A minimum of 6 months of CPAP was required to decrease carotid IMT in OSA patients. A significant decrease of carotid IMT was observed in patients with more severe OSA. This could be because these patients have more substantial physiologic abnormalities with greater degrees of nocturnal hypoxemia and higher baseline carotid IMT. Another reason to explain the result could be that compliance with CPAP treatment may be better in severe OSA patients compared with less severe OSA.

The present analysis had several limitations that warrant additional comment. First, it should be noted that although the total sample size in this meta-analysis was relatively small. Second, most of the studies included in this meta-analysis were observational rather than RCTs. Third, the follow up was relatively short in the majority of these studies, with only one study reached up to 12 months. Fourth, there was some evidence of heterogeneity among the studies, but no exact source of heterogeneity was identified. Furthermore, only papers published in English were enrolled, it may cause potential publication bias. Finally, since periodic limb movements in sleep is a risk factor for cerebral small vessel disease and is frequently associated with OSA [33, 34], periodic limb movements may be a founding factor. However, all of the studies included did not exclude the patients with periodic limb movements.

In summary, this meta-analysis did not support for a favorable effect of CPAP treatment on decreasing carotid IMT among patients with OSA. However, carotid IMT was significantly decreased after CPAP treatment in more severe OSA patients and patients with longer CPAP usage. Further Longer-term randomized trials are needed to fully characterize the efficacy of CPAP therapy on carotid IMT in OSA.

## Supporting information

**S1 File. PRISMA checklist.**  
(DOC)

## Acknowledgments

The Fujian Provincial Health Bureau provided financial support in the form of Youth Research Fund (grant 2015–1–98). The funders had no role in study design, data collection and analysis, decision to publish, or preparation of the manuscript.

## Author Contributions

**Conceptualization:** Li-Da Chen, Zhi-Ming Cai.

**Data curation:** Li Lin.

**Formal analysis:** Li Lin, Xue-Jun Lin.

**Funding acquisition:** Li-Da Chen.

**Investigation:** Yang-Wu Ou.

**Methodology:** Yang-Wu Ou, Zhi Wu.

**Project administration:** Li-Da Chen.

**Resources:** Yu-Ming Ye.

**Software:** Qiao-Zhen Xu.

**Supervision:** Zhi-Ming Cai.

**Validation:** Zhi-Ming Cai.

**Visualization:** Zhi-Ming Cai.

**Writing – original draft:** Li-Da Chen.

**Writing – review & editing:** Ya-Ping Huang, Zhi-Ming Cai.

## References

1. Sleep-related breathing disorders in adults: recommendations for syndrome definition and measurement techniques in clinical research. The Report of an American Academy of Sleep Medicine Task Force. *Sleep*. 1999; 22(5):667–89. Epub 1999/08/18. PMID: [10450601](https://pubmed.ncbi.nlm.nih.gov/10450601/).
2. Young T, Palta M, Dempsey J, Skatrud J, Weber S, Badr S. The occurrence of sleep-disordered breathing among middle-aged adults. *The New England journal of medicine*. 1993; 328(17):1230–5. Epub 1993/04/29. <https://doi.org/10.1056/NEJM199304293281704> PMID: [8464434](https://pubmed.ncbi.nlm.nih.gov/8464434/).
3. McNicholas WT, Bonsignore MR. Sleep apnoea as an independent risk factor for cardiovascular disease: current evidence, basic mechanisms and research priorities. *The European respiratory journal*. 2007; 29(1):156–78. Epub 2007/01/02. <https://doi.org/10.1183/09031936.00027406> PMID: [17197482](https://pubmed.ncbi.nlm.nih.gov/17197482/).
4. Buratti L, Luzzi S, Petrelli C, Baldinelli S, Viticchi G, Provinciali L, et al. Obstructive Sleep Apnea Syndrome: An Emerging Risk Factor for Dementia. *CNS & neurological disorders drug targets*. 2016; 15(6):678–82. Epub 2016/05/18. PMID: [27189468](https://pubmed.ncbi.nlm.nih.gov/27189468/).

5. Polak JF, Pencina MJ, Pencina KM, O'Donnell CJ, Wolf PA, D'Agostino RB, Sr. Carotid-wall intima-media thickness and cardiovascular events. *The New England journal of medicine*. 2011; 365(3):213–21. Epub 2011/07/22. <https://doi.org/10.1056/NEJMoa1012592> PMID: 21774709;
6. Lorenz MW, Markus HS, Bots ML, Rosvall M, Sitzer M. Prediction of clinical cardiovascular events with carotid intima-media thickness: a systematic review and meta-analysis. *Circulation*. 2007; 115(4):459–67. Epub 2007/01/24. <https://doi.org/10.1161/CIRCULATIONAHA.106.628875> PMID: 17242284.
7. Marshall RS, Festa JR, Cheung YK, Chen R, Pavol MA, Derdeyn CP, et al. Cerebral hemodynamics and cognitive impairment: baseline data from the RECON trial. *Neurology*. 2012; 78(4):250–5. Epub 2012/01/13. <https://doi.org/10.1212/WNL.0b013e31824365d3> PMID: 22238418;.
8. Balucani C, Viticchi G, Falsetti L, Silvestrini M. Cerebral hemodynamics and cognitive performance in bilateral asymptomatic carotid stenosis. *Neurology*. 2012; 79(17):1788–95. Epub 2012/10/12. <https://doi.org/10.1212/WNL.0b013e318270402e> PMID: 23054236.
9. Drager LF, Bortolotto LA, Lorenzi MC, Figueiredo AC, Krieger EM, Lorenzi-Filho G. Early signs of atherosclerosis in obstructive sleep apnea. *American journal of respiratory and critical care medicine*. 2005; 172(5):613–8. Epub 2005/05/20. <https://doi.org/10.1164/rccm.200503-340OC> PMID: 15901608.
10. Baguet JP, Hammer L, Levy P, Pierre H, Launois S, Mallion JM, et al. The severity of oxygen desaturation is predictive of carotid wall thickening and plaque occurrence. *Chest*. 2005; 128(5):3407–12. Epub 2005/11/24. <https://doi.org/10.1378/chest.128.5.3407> PMID: 16304292.
11. Suzuki T, Nakano H, Maekawa J, Okamoto Y, Ohnishi Y, Yamauchi M, et al. Obstructive sleep apnea and carotid-artery intima-media thickness. *Sleep*. 2004; 27(1):129–33. Epub 2004/03/05. PMID: 14998249.
12. Hui DS, Shang Q, Ko FW, Ng SS, Szeto CC, Ngai J, et al. A prospective cohort study of the long-term effects of CPAP on carotid artery intima-media thickness in obstructive sleep apnea syndrome. *Respiratory research*. 2012; 13:22. Epub 2012/03/20. <https://doi.org/10.1186/1465-9921-13-22> PMID: 22424053;.
13. Drager LF, Bortolotto LA, Figueiredo AC, Krieger EM, Lorenzi GF. Effects of continuous positive airway pressure on early signs of atherosclerosis in obstructive sleep apnea. *American journal of respiratory and critical care medicine*. 2007; 176(7):706–12. Epub 2007/06/09. <https://doi.org/10.1164/rccm.200703-500OC> PMID: 17556718.
14. Kostopoulos K, Alhanatis E, Pampoukas K, Georgiopoulos G, Zourla A, Panoutsopoulos A, et al. CPAP therapy induces favorable short-term changes in epicardial fat thickness and vascular and metabolic markers in apparently healthy subjects with obstructive sleep apnea-hypopnea syndrome (OSAHS). *Sleep & breathing = Schlaf & Atmung*. 2016; 20(2):483–93. Epub 2015/08/01. <https://doi.org/10.1007/s11325-015-1236-5> PMID: 26223484.
15. Ng SS, Liu EK, Ma RC, Chan TO, To KW, Chan KK, et al. Effects of CPAP therapy on visceral fat thickness, carotid intima-media thickness and adipokines in patients with obstructive sleep apnoea. *Respirology*. 2016. Epub 2016/12/10.
16. Català R, Ferré R, Cabré A, Girona J, Porto M, Teixidó A, et al. Long-term effects of continuous positive airway pressure treatment on subclinical atherosclerosis in obstructive sleep apnoea syndrome. *Medicina clinica*. 2016; 147(1):1–6. <https://doi.org/10.1016/j.medcli.2016.03.032> PMID: 27210810
17. Chen B, Zhang W, Chen Y, Hu C, Bian H, He J, et al. [Association of obstructive sleep apnea hypopnea syndrome with carotid atherosclerosis and the efficacy of continuous positive airway pressure treatment]. *Zhonghua yi xue za zhi*. 2015; 95(34):2791–5. Epub 2015/12/30. PMID: 26711980.
18. Sharma SK, Agrawal S, Damodaran D, Sreenivas V, Kadhiravan T, Lakshmy R, et al. CPAP for the metabolic syndrome in patients with obstructive sleep apnea. *The New England journal of medicine*. 2011; 365(24):2277–86. Epub 2011/12/16. <https://doi.org/10.1056/NEJMoa1103944> PMID: 22168642.
19. Drager LF, Bortolotto LA, Figueiredo AC, Krieger EM, Lorenzi-Filho G. Effects of continuous positive airway pressure on early signs of atherosclerosis in obstructive sleep apnea. *American journal of respiratory and critical care medicine*. 2007; 176(7):706–12. <https://doi.org/10.1164/rccm.200703-500OC> PMID: 17556718
20. Li C, Zhang XL, Liu H, Wang ZG, Yin KS. Association among plasma interleukin-18 levels, carotid intima-media thickness and severity of obstructive sleep apnea. *Chinese medical journal*. 2009; 122(1):24–9. Epub 2009/02/04. PMID: 19187612.
21. Agha MA, Habib RM. Assessment of carotid artery wall in patients with OSA syndrome and the effect of CPAP on its thickness. *Egyptian Journal of Chest Diseases and Tuberculosis*. 2014; 63(1):155–60. <https://doi.org/10.1016/j.ejcdt.2013.10.006>
22. Amin M. Can continuous positive air way pressure reverse carotid artery atherosclerosis in obstructive sleep apnea? *Egyptian Journal of Chest Diseases and Tuberculosis*. 2016; 65(4):765–9. <https://doi.org/10.1016/j.ejcdt.2016.03.002>

23. Kablak-Ziembicka A, Przewlocki T, Sokolowski A, Tracz W, Podolec P. Carotid intima-media thickness, hs-CRP and TNF-alpha are independently associated with cardiovascular event risk in patients with atherosclerotic occlusive disease. *Atherosclerosis*. 2011; 214(1):185–90. Epub 2010/11/12. <https://doi.org/10.1016/j.atherosclerosis.2010.10.017> PMID: 21067752.
24. Rosvall M, Janzon L, Berglund G, Engstrom G, Hedblad B. Incidence of stroke is related to carotid IMT even in the absence of plaque. *Atherosclerosis*. 2005; 179(2):325–31. Epub 2005/03/22. <https://doi.org/10.1016/j.atherosclerosis.2004.10.015> PMID: 15777549.
25. Kim ES, Mo EY, Moon SD, Han JH. Mean Platelet Volume Is Closely Associated With Serum Glucose Level but Not With Arterial Stiffness and Carotid Atherosclerosis in Patients With Type 2 Diabetes. *The Journal of clinical endocrinology and metabolism*. 2015; 100(9):3502–8. Epub 2015/06/30. <https://doi.org/10.1210/JC.2015-1540> PMID: 26120789.
26. van den Oord SC, Sijbrands EJ, ten Kate GL, van Klaveren D, van Domburg RT, van der Steen AF, et al. Carotid intima-media thickness for cardiovascular risk assessment: systematic review and meta-analysis. *Atherosclerosis*. 2013; 228(1):1–11. Epub 2013/02/12. <https://doi.org/10.1016/j.atherosclerosis.2013.01.025> PMID: 23395523.
27. Buratti L, Viticchi G, Falsetti L, Cagnetti C, Luzzi S, Bartolini M, et al. Vascular impairment in Alzheimer's disease: the role of obstructive sleep apnea. *Journal of Alzheimer's disease: JAD*. 2014; 38(2):445–53. Epub 2013/08/30. <https://doi.org/10.3233/JAD-131046> PMID: 23985418.
28. Zhou M, Guo B, Wang Y, Yan D, Lin C, Shi Z. The Association Between Obstructive Sleep Apnea and Carotid Intima-Media Thickness: A Systematic Review and Meta-Analysis. *Angiology*. 2016. Epub 2016/09/02. <https://doi.org/10.1177/0003319716665985> PMID: 27581069.
29. Garvey JF, Taylor CT, McNicholas WT. Cardiovascular disease in obstructive sleep apnoea syndrome: the role of intermittent hypoxia and inflammation. *The European respiratory journal*. 2009; 33(5):1195–205. Epub 2009/05/02. <https://doi.org/10.1183/09031936.00111208> PMID: 19407053.
30. Savransky V, Jun J, Li J, Nanayakkara A, Fonti S, Moser AB, et al. Dyslipidemia and atherosclerosis induced by chronic intermittent hypoxia are attenuated by deficiency of stearoyl coenzyme A desaturase. *Circulation research*. 2008; 103(10):1173–80. Epub 2008/10/04. <https://doi.org/10.1161/CIRCRESAHA.108.178533> PMID: 18832746;.
31. Shimizu K, Chin K, Nakamura T, Masuzaki H, Ogawa Y, Hosokawa R, et al. Plasma leptin levels and cardiac sympathetic function in patients with obstructive sleep apnoea-hypopnoea syndrome. *Thorax*. 2002; 57(5):429–34. Epub 2002/04/30. <https://doi.org/10.1136/thorax.57.5.429> PMID: 11978920;.
32. Xie X, Pan L, Ren D, Du C, Guo Y. Effects of continuous positive airway pressure therapy on systemic inflammation in obstructive sleep apnea: a meta-analysis. *Sleep medicine*. 2013; 14(11):1139–50. Epub 2013/09/24. <https://doi.org/10.1016/j.sleep.2013.07.006> PMID: 24054505.
33. Buratti L, Petrelli C, Viticchi G, Falsetti L, Luzzi S, Provinciali L, et al. Restless legs syndrome and periodic limb movements after lacunar stroke. *Sleep medicine*. 2017; 34:251–2. Epub 2017/03/14. <https://doi.org/10.1016/j.sleep.2017.01.015> PMID: 28285871.
34. Ferri R, Cosentino FI, Moussouttas M, Lanuzza B, Arico D, Bagai K, et al. Silent Cerebral Small Vessel Disease in Restless Legs Syndrome. *Sleep*. 2016; 39(7):1371–7. Epub 2016/04/20. <https://doi.org/10.5665/sleep.5966> PMID: 27091527;.
